# Supplementary material for: Macrophage membrane-modified targeted phase-change nanoparticles for multimodal imaging of experimental autoimmune myocarditis
Source: Royal Society of Chemistry journal article supplement (doi:10.1039/d3nr05391a), 2024-01-01
Supplement: d3nr05391a1.pdf [file d3nr05391a1.pdf]

**Macrophage membrane-modified targeted phase-change  
nanoparticles for multimodal imaging of experimental autoimmune  
myocarditis**

Dan Yin PhD<sup>12345</sup>, Min Zheng PhD<sup>2345</sup>, Qin Zhang PhD<sup>6</sup>, Mi Li PhD<sup>2345</sup>, Ping Xiang PhD<sup>2345</sup>, Jie Tian PhD<sup>2345\*</sup>

1 Department of Ultrasound, Children's Hospital of Chongqing Medical University, Chongqing, China, 2 Ministry of Education Key Laboratory of Child Development and Disorders, Chongqing, China, 3 National Clinical Research Center for Child Health and Disorders, Chongqing, China, 4 Department of cardiology, Children's Hospital of Chongqing Medical University, Chongqing, China, 5 Chongqing Key Laboratory of Pediatrics, Chongqing, China, 6 Department of Radiology, Chongqing Hospital of Traditional Chinese Medicine, Chongqing 400021, China

Corresponding author' Information

Corresponding author: Prof. Jie Tian

Children's Hospital of Chongqing Medical University,

Zhongshan Er Road, No.136, Yuzhong District,

Chongqing 400014, China

Email: [jietian@cqmu.edu.cn](mailto:jietian@cqmu.edu.cn)

## List of Supplementary Figures and Tables

*Supplementary Figure1. Toxicity evaluation of MM/NPs in vitro and in vivo.*

*Supplementary Figure2. The standard curve was made according to the concentration and O.D. of the standard.*

*Table1. Body weight and heart weight of two groups*

Supplementary information Figure1. Toxicity evaluation of MM/NPs. A) Cell viability of H9C2 cells after co-incubation with different concentrations of NPs and MM/NPs(n=6). B) The routine blood indexes in the control group (intravenous injection saline) and the experimental groups (1, 7, 14d, 21d intravenous injection of MM/NPs) (n = 3). C) Blood biochemical indexes analysis from the control group and the experimental groups at 1, 7, 14, and 21d post intravenous injection of MM/NPs (n = 3). D) HE staining of major organs from the control group and experimental groups after 7d and 21d of intravenous administration with MM/NPs ( $\times 200$  magnification, scale bar: 200  $\mu\text{m}$ )

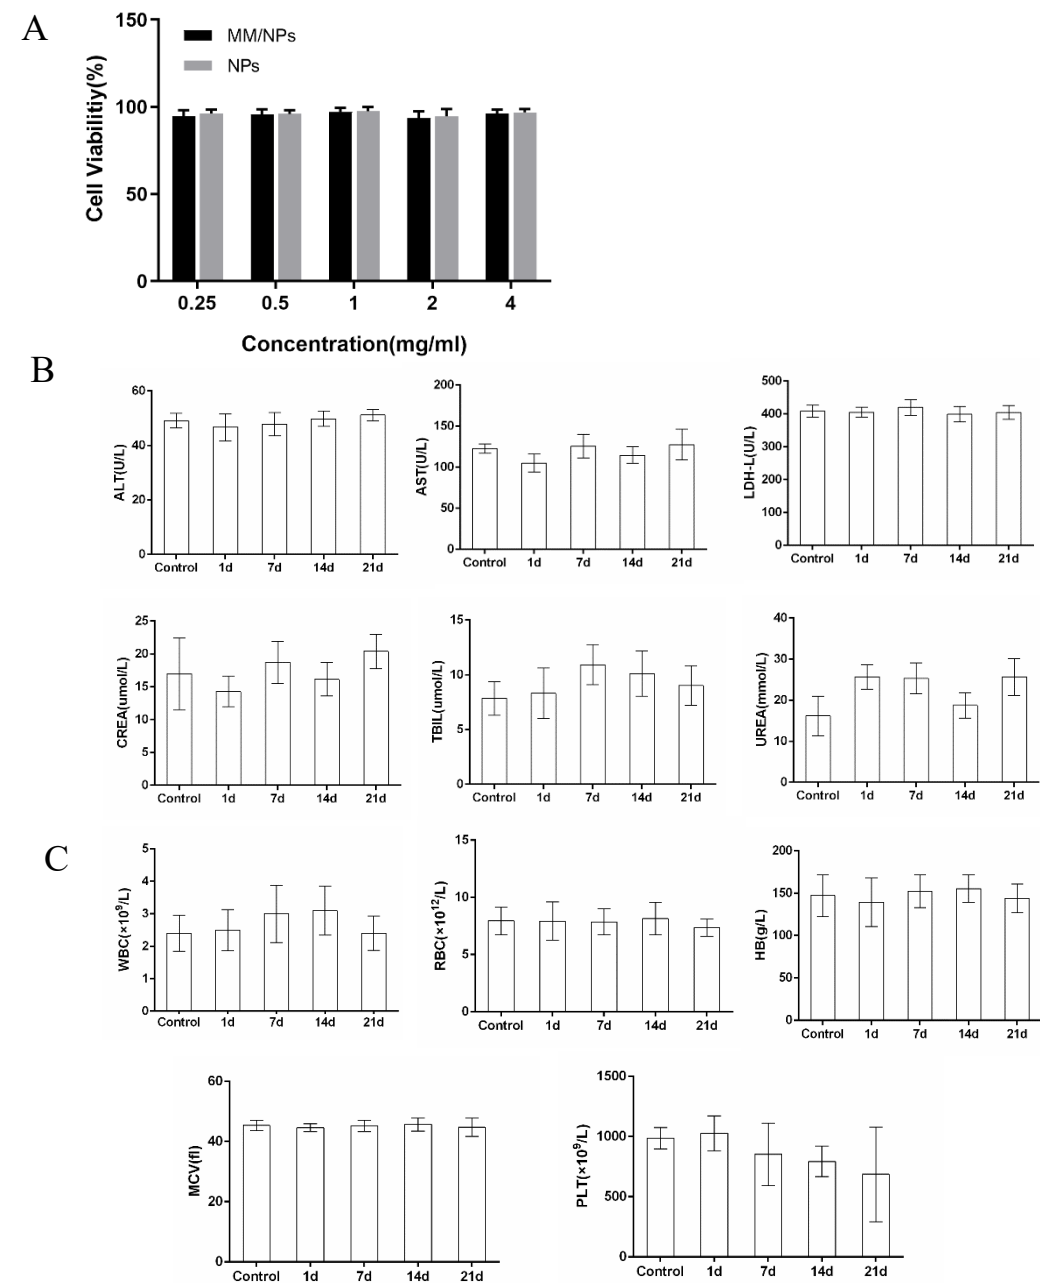

D

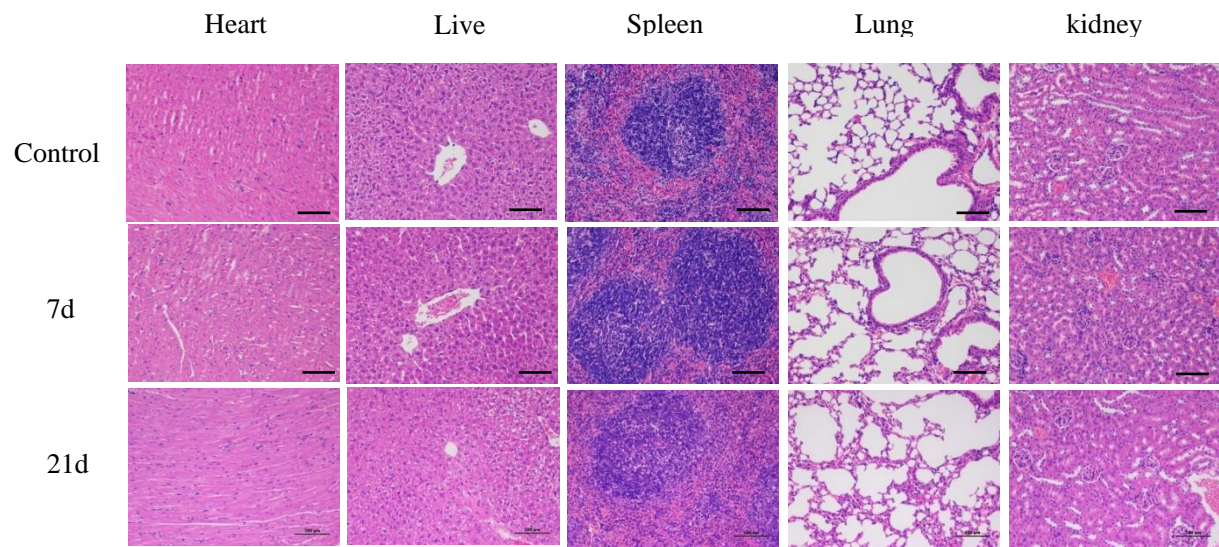

Supplementary information Figure2. The standard curve was made according to the concentration and O.D. of the standard

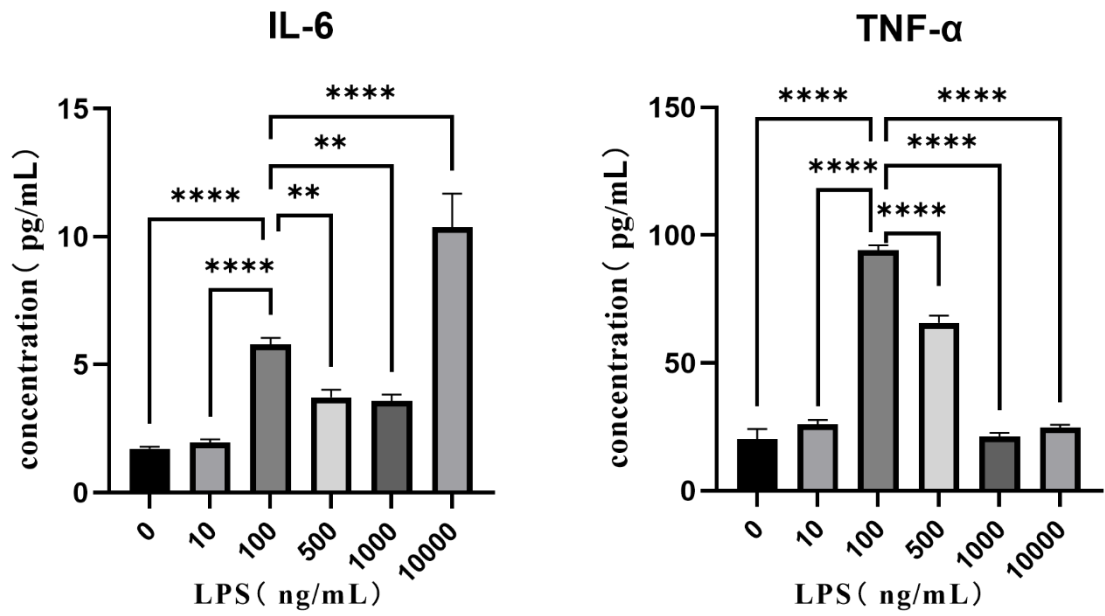

Supplementary information Table1. Body weight and heart weight of two groups

|         | HW(mg)            | BW b(g)      | BW s(g)          | BW change(%)  | HW/BW(mg/g)   |
|---------|-------------------|--------------|------------------|---------------|---------------|
| Control | 89.04 ± 0.99      | 18.61 ± 0.29 | 22.34 ± 0.42     | 20.47±2.09    | 3.99±0.08     |
| EAM     | 110.18 ± 1.50**** | 18.38 ± 0.21 | 18.51 ± 0.23**** | 3.84±0.76**** | 5.96±0.10**** |

BW b: Basal body weight, BW s: Body weight at sacrifice, HW: heart weight (\*P< 0.05; \*\*P<0.01; \*\*\*P<0.005; \*\*\*\*P < 0.001)
